# Supplementary material for: Synthesis and Characterization of Ag/ZnO Nanoparticles for Bacteria Disinfection in Water
Source: MDPI journal article supplement (doi:10.3390/nano12101764), 2022-05-22
Supplement: s1 [file s1]

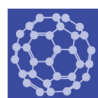

## Article

# Synthesis and Characterization of Ag/ZnO Nanoparticles for Bacteria Disinfection in Water

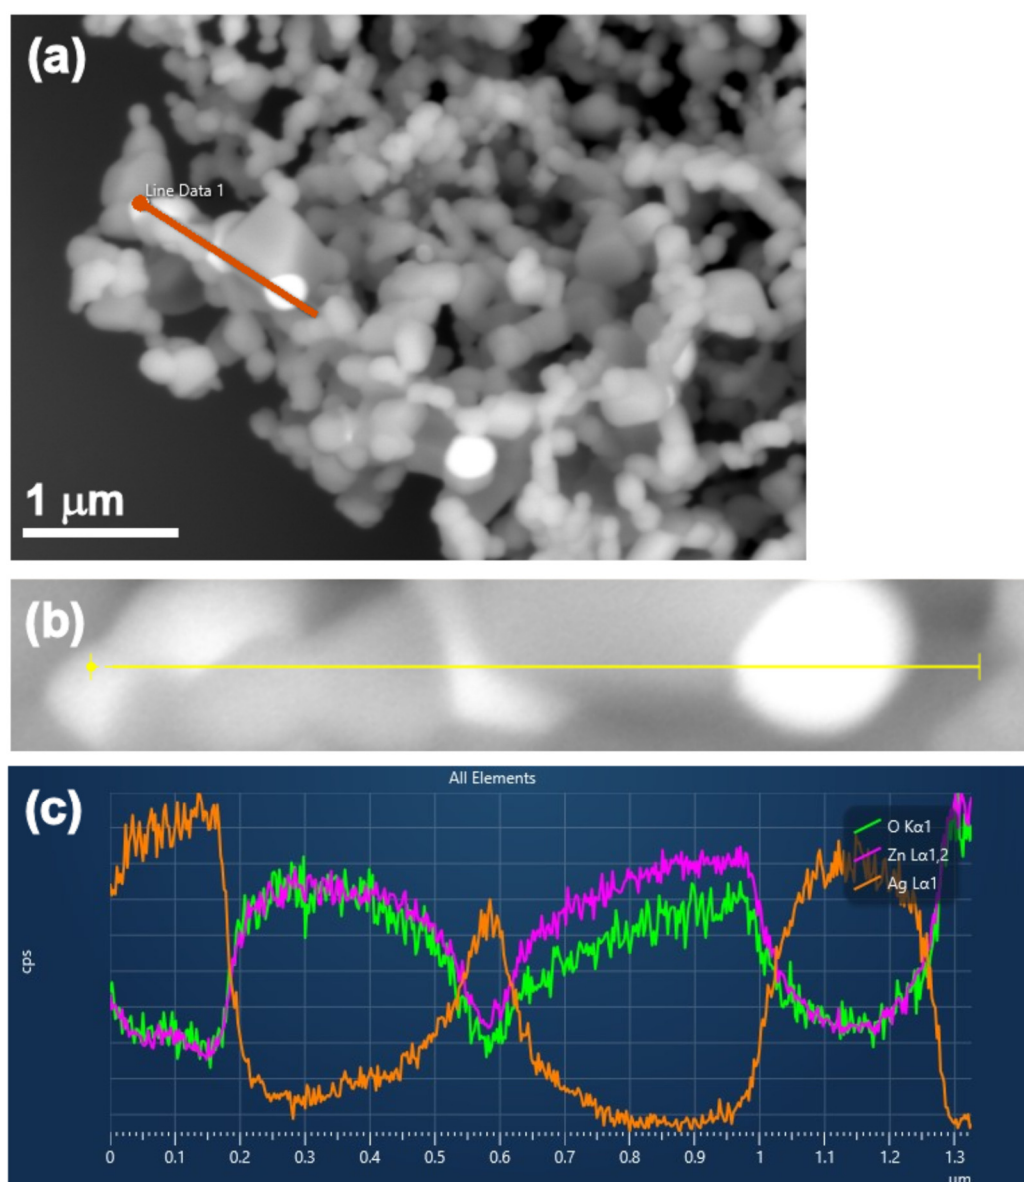

**Figure S1.** BSE-SEM image of Ag/ZnO (I) (a), enlarged area of line analysis (b) and SEM-EDX line scan profiles of Zn (magenta), O (green) and Ag (orange) (c). Orange line in image a indicate the area of line analysis.

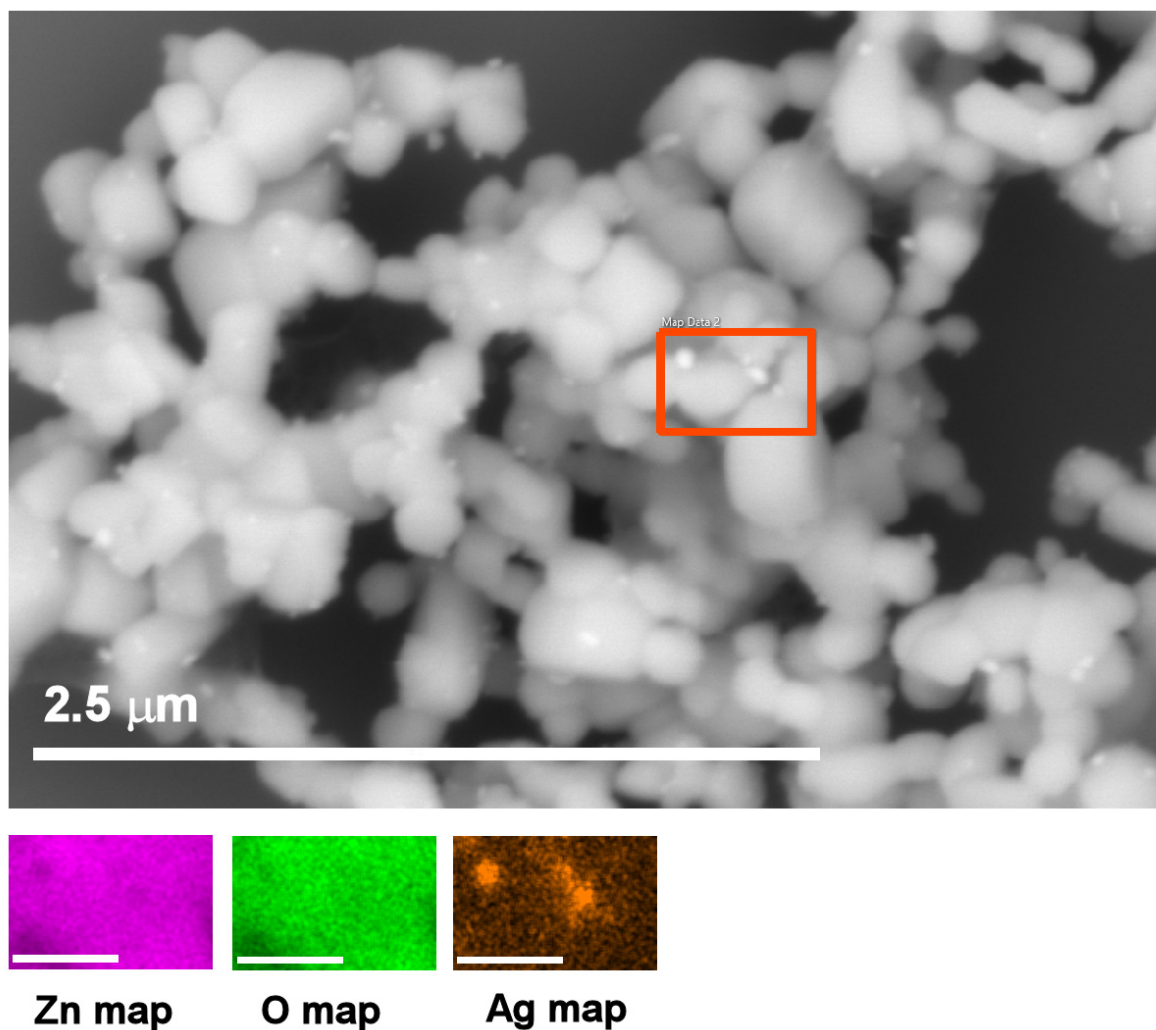

**Figure S2.** BSE-SEM image of Ag/ZnO (II) with EDXS elemental maps of Zn, O and Ag. Scale bar on the elemental maps is 250 nm. Orange frame in BSE-SEM image indicates area of analysis.

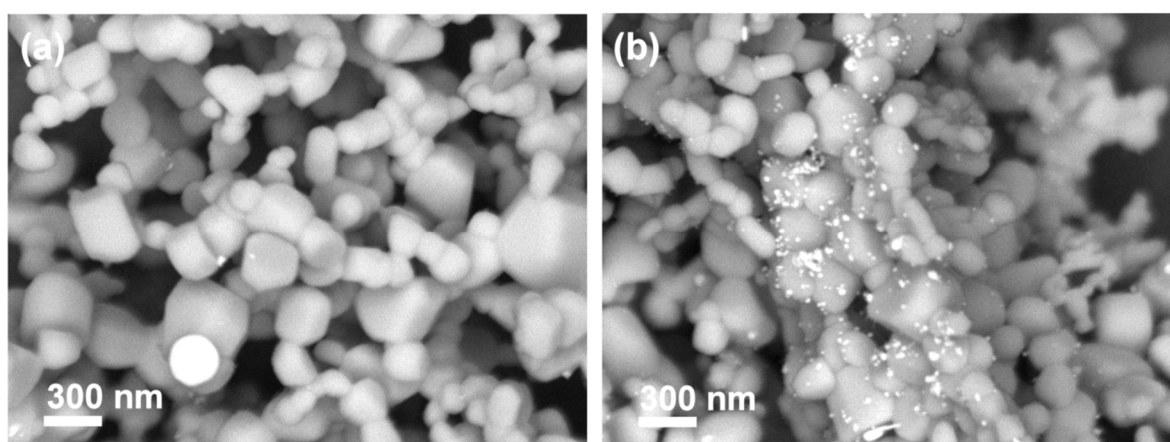

**Figure S3.** SEM images of Ag/ZnO (I) (a) and Ag/ZnO (II) (b) captured with a backscattered electron (BSE) detector.

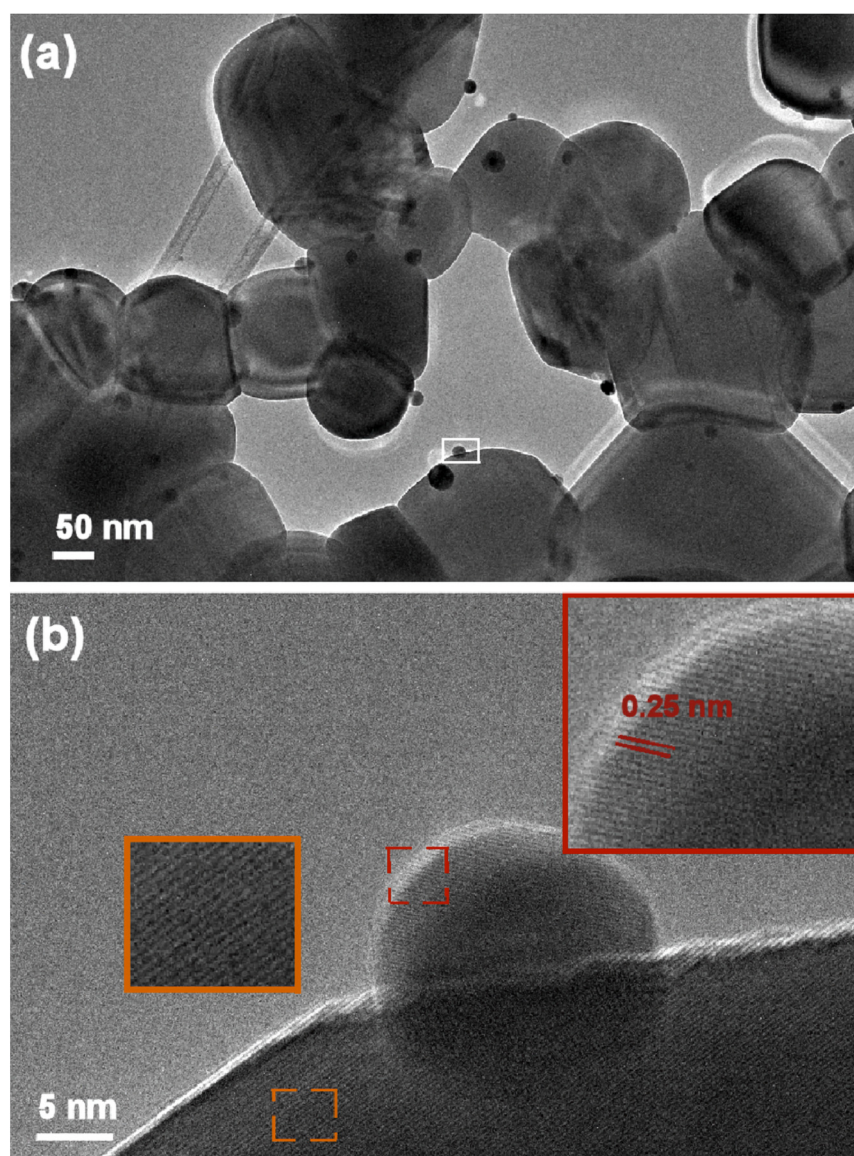

**Figure S4.** Characteristic TEM images of Ag loaded ZnO sample prepared by ex situ doping (Ag/ZnO (II)) The white rectangular frame in the image (a) indicates an area of the image (b). The red and orange frames indicate the areas of the HRTEM insets in the image b. The round particle in the image b is crystalline, the average d-spacing is 0.25 nm and corresponds to (004) planes of hexagonal Ag (PDF No. 01-087-0598).
